# Supplementary material for: Burdens and patterns of gastrointestinal diseases in Thai children: An analysis based on Thai National Health Coverage data
Source: Research Square preprint supplement (doi:10.21203/rs.3.rs-5958744/v1), 2025-02-06
Supplement: Supplementary file 1 [file 7cddef8a10ea54431b58cffb.docx]

# **Supplementary Table 2** Admission numbers and inpatient mortality rates of each pediatric gastrointestinal disease according to the primary diagnosis in the fiscal year 2022–2023

| **Primary diagnosis according to ICD-10** | **Number of admissions** | | | | | **Inpatient mortality rate (deaths per 1,000 admissions)** | | | | |
| --- | --- | --- | --- | --- | --- | --- | --- | --- | --- | --- |
| **<1 y** | **1-5 y** | **6-12 y** | **13-17 y** | **Total** | **<1 y** | **1-5 y** | **6-12 y** | **13-17 y** | **Total** |
| *C16,* Malignant neoplasm of stomach | 0 | 1 | 0 | 3 | 4 | - | 0 | - | 0 | 0 |
| *C17,* Malignant neoplasm of small intestine | 0 | 0 | 1 | 0 | 1 | - | - | 0 | - | 0 |
| *C18,* Malignant neoplasm of colon | 1 | 0 | 3 | 24 | 28 | 0 | - | 0 | 41.7 | 35.7 |
| *C19,* Malignant neoplasm of rectosigmoid junction | 0 | 0 | 1 | 1 | 2 | - | - | 0 | 0 | 0 |
| *C20,* Malignant neoplasm of rectum | 0 | 0 | 1 | 5 | 6 | - | - | 0 | 0 | 0 |
| *C22,* Malignant neoplasm of liver and intrahepatic bile ducts | 1 | 190 | 30 | 17 | 238 | 0 | 15.8 | 66.7 | 0 | 21.0 |
| *C23,* Malignant neoplasm of gallbladder | 0 | 0 | 0 | 1 | 1 | - | - | - | 0 | 0 |
| *C25,* Malignant neoplasm of the pancreas | 0 | 1 | 10 | 5 | 16 | - | 0 | 0 | 0 | 0 |
| *K00,* Disorders of tooth development and eruption | 135 | 4 | 28 | 16 | 183 | 0 | 0 | 0 | 0 | 0 |
| *K01,* Embedded and impacted teeth | 0 | 0 | 43 | 131 | 174 | - | - | 0 | 0 | 0 |
| *K02,* Dental caries | 0 | 390 | 253 | 78 | 721 | - | 0 | 0 | 0 | 0 |
| *K03,* Other diseases of hard tissues of teeth | 0 | 4 | 1 | 2 | 7 | - | 0 | 0 | 0 | 0 |
| *K04*, Diseases of pulp and periapical tissues | 0 | 281 | 201 | 70 | 552 | - | 0 | 0 | 0 | 0 |
| *K05,* Gingivitis and periodontal diseases | 0 | 177 | 85 | 36 | 298 | - | 0 | 0 | 0 | 0 |
| *K06,* Other disorders of gingiva and edentulous alveolar ridge | 0 | 6 | 17 | 7 | 30 | - | 0 | 0 | 0 | 0 |
| *K07,* Dentofacial anomalies [including malocclusion] | 0 | 4 | 14 | 10 | 28 | - | 0 | 0 | 0 | 0 |
| *K08,* Other disorders of teeth and supporting structures | 0 | 9 | 126 | 78 | 213 | - | 0 | 0 | 0 | 0 |
| *K09,* Cysts of oral region, not elsewhere classified | 24 | 6 | 64 | 52 | 146 | 0 | 0 | 0 | 0 | 0 |
| *K10,* Other diseases of jaws | 0 | 4 | 7 | 8 | 19 | - | 0 | 0 | 0 | 0 |
| *K11,* Diseases of salivary glands | 2 | 313 | 344 | 126 | 785 | 0 | 0 | 0 | 0 | 0 |
| *K12,* Stomatitis and related lesions | 0 | 578 | 510 | 199 | 1287 | - | 0 | 0 | 5.0 | 0.8 |
| *K13,* Other diseases of lip and oral mucosa | 5 | 44 | 118 | 33 | 200 | 0 | 0 | 0 | 0 | 0 |
| *K14,* Diseases of the tongue | 1 | 18 | 22 | 5 | 46 | 0 | 0 | 0 | 0 | 0 |
| *K20,* Esophagitis | 0 | 8 | 12 | 24 | 44 | - | 0 | 0 | 0 | 0 |
| *K21,* Gastroesophageal reflux disease | 9 | 56 | 101 | 81 | 247 | 0 | 0 | 0 | 0 | 0 |
| *K22,* Other diseases of the esophagus | 0 | 72 | 79 | 104 | 255 | - | 0 | 0 | 0 | 0 |
| *K25,* Gastric ulcer | 0 | 8 | 18 | 34 | 60 | - | 0 | 111.1 | 0 | 33.3 |
| *K26,* Duodenal ulcer | 0 | 5 | 9 | 27 | 41 | - | 0 | 0 | 0 | 0 |
| *K27,* Peptic ulcer, site unspecified | 0 | 19 | 36 | 17 | 72 | - | 0 | 0 | 0 | 0 |
| *K28,* Gastrojejunal ulcer | 0 | 5 | 5 | 1 | 11 | - | 0 | 0 | 0 | 0 |
| *K29,* Gastritis and duodenitis | 22 | 12,215 | 8,823 | 1,448 | 22,508 | 0 | 0 | 0.1 | 0 | 0 |
| *K30,* Functional dyspepsia | 0 | 303 | 875 | 800 | 1,978 | - | 0 | 0 | 0 | 0 |
| *K31,* Other diseases of stomach and duodenum | 1 | 19 | 15 | 27 | 62 | 0 | 0 | 0 | 0 | 0 |
| *K35,* Acute appendicitis | 1 | 1,365 | 9,459 | 9,693 | 20,518 | 0 | 0 | 0.4 | 0.5 | 0.4 |
| *K36,* Other appendicitis | 0 | 1 | 11 | 13 | 25 | - | 0 | 0 | 0 | 0 |
| *K37,* Unspecified appendicitis | 0 | 12 | 44 | 59 | 115 | - | 0 | 0 | 0 | 0 |
| *K38,* Other diseases of appendix | 0 | 7 | 7 | 10 | 24 | - | 0 | 0 | 0 | 0 |
| *K40,* Inguinal hernia | 15 | 1,103 | 545 | 168 | 1,831 | 0 | 0 | 0 | 0 | 0 |
| *K41,* Femoral hernia | 0 | 2 | 3 | 2 | 7 | - | 0 | 0 | 0 | 0 |
| *K42,* Umbilical hernia | 9 | 12 | 6 | 3 | 30 | 0 | 0 | 0 | 0 | 0 |
| *K43,* Ventral hernia | 2 | 9 | 11 | 3 | 25 | 0 | 0 | 0 | 0 | 0 |
| *K44,* Diaphragmatic hernia | 2 | 9 | 7 | 1 | 19 | 0 | 0 | 0 | 0 | 0 |
| *K45,* Other abdominal hernia | 0 | 0 | 1 | 0 | 1 | - | - | 0 | - | 0 |
| *K46,* Unspecified abdominal hernia | 1 | 5 | 1 | 3 | 10 | 0 | 0 | 0 | 0 | 0 |
| *K50,* Crohn's disease (regional enteritis) | 0 | 46 | 55 | 83 | 184 | - | 0 | 0 | 0 | 0 |
| *K51,* Ulcerative colitis | 1 | 34 | 49 | 27 | 111 | 0 | 0 | 0 | 0 | 0 |
| *K52,* Other and unspecified noninfective gastroenteritis and colitis | 15 | 735 | 482 | 211 | 1,443 | 0 | 0 | 0 | 0 | 0 |
| *K55,* Vascular disorders of the intestine | 0 | 9 | 21 | 11 | 41 | - | 111.1 | 0 | 0 | 24.4 |
| *K56,* Paralytic ileus and intestinal obstruction without hernia | 10 | 838 | 641 | 459 | 1,948 | 0 | 2.4 | 4.7 | 4.4 | 3.6 |
| *K57,* Diverticular disease of the intestine | 1 | 1 | 7 | 20 | 29 | 0 | 0 | 0 | 0 | 0 |
| *K58,* Irritable bowel syndrome | 0 | 3 | 19 | 15 | 37 | - | 0 | 0 | 0 | 0 |
| *K59,* Other functional intestinal disorders | 12 | 1,032 | 986 | 201 | 2,231 | 0 | 0 | 0 | 0 | 0 |
| *K60,* Fissure and fistula of anal and rectal regions | 10 | 25 | 32 | 104 | 171 | 0 | 0 | 0 | 0 | 0 |
| *K61,* Abscess of anal and rectal regions | 7 | 59 | 61 | 213 | 340 | 0 | 0 | 0 | 0 | 0 |
| *K62,* Other diseases of the anus and rectum | 4 | 84 | 49 | 53 | 190 | 0 | 0 | 0 | 0 | 0 |
| *K63,* Other diseases of the intestine | 7 | 30 | 33 | 37 | 107 | 0 | 0 | 30.3 | 0 | 9.3 |
| *K64,* Hemorrhoids and perianal venous thrombosis | 0 | 7 | 5 | 40 | 52 | - | 0 | 0 | 0 | 0 |
| *K65,* Peritonitis | 0 | 40 | 100 | 119 | 259 | - | 25.0 | 20 | 16.8 | 19.3 |
| *K66,* Other disorders of peritoneum | 0 | 14 | 11 | 9 | 34 | - | 0 | 0 | 0 | 0 |
| *K70,* Alcoholic liver disease | 0 | 0 | 0 | 6 | 6 | - | - | - | 0 | 0 |
| *K71,* Toxic liver disease | 0 | 10 | 10 | 57 | 77 | - | 0 | 0 | 0 | 0 |
| *K72,* Hepatic failure, not elsewhere classified | 0 | 11 | 14 | 22 | 47 | - | 90.9 | 71.4 | 136.4 | 106.4 |
| *K73,* Chronic hepatitis, not elsewhere classified | 0 | 3 | 3 | 1 | 7 | - | 0 | 0 | 0 | 0 |
| *K74,* Fibrosis and cirrhosis of the liver | 0 | 33 | 42 | 21 | 96 | - | 0 | 23.8 | 0 | 10.4 |
| *K75,* Other inflammatory liver diseases | 0 | 35 | 79 | 99 | 213 | - | 0 | 0 | 10.1 | 4.7 |
| *K76,* Other diseases of the liver | 0 | 19 | 43 | 28 | 90 | - | 52.6 | 0 | 0 | 11.1 |
| *K80,* Cholelithiasis | 0 | 15 | 96 | 297 | 408 | - | 0 | 0 | 0 | 0 |
| *K81,* Cholecystitis | 1 | 1 | 20 | 96 | 118 | 0 | 0 | 0 | 0 | 0 |
| *K82,* Other diseases of the gallbladder | 0 | 0 | 2 | 4 | 6 | - | - | 0 | 0 | 0 |
| *K83,* Other diseases of the biliary tract | 0 | 26 | 66 | 70 | 162 | - | 0 | 0 | 0 | 0 |
| *K85,* Acute pancreatitis | 0 | 21 | 72 | 157 | 250 | - | 0 | 41.7 | 6.4 | 16.0 |
| *K86,* Other diseases of the pancreas. | 0 | 5 | 40 | 38 | 83 | - | 0 | 0 | 0 | 0 |
| *K90,* Intestinal malabsorption | 1 | 12 | 16 | 4 | 33 | 0 | 0 | 0 | 0 | 0 |
| *K91,* Intraoperative and postprocedural complications and disorders of the digestive system, not elsewhere classified | 0 | 117 | 130 | 25 | 272 | - | 8.5 | 0 | 0 | 3.7 |
| *K92,* Other diseases of the digestive system | 7 | 262 | 347 | 559 | 1,175 | 0 | 3.8 | 0 | 1.8 | 1.7 |
| *Total* | 307 | 20,792 | 25,478 | 16,511 | 63,088 | 0 | 0.5 | 0.8 | 1.0 | 0.8 |

# **Supplementary Table 3** Admission numbers in children with gastrointestinal diseases from 2015 to 2012

| **Year** | **2015** | **2016** | **2017** | **2018** | **2019** | **2020** | **2021** | **2022** |
| --- | --- | --- | --- | --- | --- | --- | --- | --- |
| Total, n (% of all inpatient diagnoses) | 252,353 (13.6) | 291,797 (15.7) | 243,463 (13.1) | 296,040 (16.0) | 282,398 (15.2) | 199,769 (10.8) | 134,220 (7.2) | 152,672 (8.2) |
| *According to the diagnosis groups, n (%)* | | | | | | | | |
| - A00-A09 | 159,112 (63.1) | 187,901 (64.4) | 152,896 (62.8) | 196,328 (66.3) | 183,090 (64.8) | 126,975 (63.6) | 78,670 (58.6) | 91,761 (60.1) |
| - C15-C26 | 469 (0.2) | 490 (0.2) | 498 (0.2) | 502 (0.2) | 488 (0.2) | 597 (0.3) | 613 (0.5) | 411 (0.3) |
| - K00-K14 | 5,264 (2.1) | 5,471 (1.9) | 5,621 (2.3) | 5,858 (2.0) | 5,935 (2.1) | 4,818 (2.4) | 3,417 (2.6) | 3,692 (2.4) |
| - K20-K31 | 35,710 (14.2) | 45,587 (15.6) | 34,322 (14.1) | 40,755 (13.8) | 40,113 (14.2) | 22,241 (11.1) | 14,724 (11.0) | 18,981 (12.4) |
| - K35-K38 | 26,578 (10.5) | 26,240 (9.0) | 25,366 (10.4) | 25,449 (8.6) | 24,423 (8.7) | 22,114 (11.1) | 18,927 (14.1) | 19,895 (13.0) |
| - K40-K46 | 3,996 (1.6) | 3,756 (1.3) | 3,413 (1.4) | 3,480 (1.2) | 3,230 (1.1) | 2,597 (1.3) | 1,773 (1.3) | 1,849 (1.2) |
| - K50-K52 | 2,752 (1.1) | 2,834 (1.0) | 2,446 (1.0) | 3,105 (1.1) | 2,971 (1.1) | 2,016 (1.0) | 1,250 (0.9) | 1,219 (0.8) |
| - K55-K64 | 5,425 (2.2) | 5,944 (2.0) | 6,205 (2.6) | 6,639 (2.2) | 6,460 (2.3) | 5,602 (2.8) | 4,659 (3.5) | 4,473 (2.9) |
| - K65-K67 | 422 (0.2) | 397 (0.1) | 391 (0.2) | 371 (0.1) | 347 (0.1) | 298 (0.2) | 238 (0.2) | 245 (0.2) |
| *According to age groups, n (%)* | | | | | | | | |
| - <1 year | 40,840 (16.2) | 44,120 (15.1) | 38,074 (15.6) | 42,666 (14.4) | 41,723 (14.8) | 30,957 (15.5) | 21,059 (15.7) | 8,558 (5.6) |
| - 1-5 years | 114,085 (45.2) | 135,186 (46.3) | 107,286 (44.1) | 137,061 (46.3) | 128,737 (45.6) | 81,782 (40.9) | 48,925 (36.5) | 68,880 (45.1) |
| - 6-12 years | 59,684 (23.7) | 73,455 (25.2) | 62,147 (25.5) | 76,762 (25.9) | 73,032 (25.9) | 53,970 (27.0) | 37,566 (28.0) | 48,058 (31.5) |
| - 13-17 years | 37,744 (15.0) | 39,036 (13.4) | 35,956 (14.8) | 39,551 (13.4) | 38,906 (13.8) | 33,060 (16.6) | 26,670 (19.9) | 27,176 (17.8) |
| *According to sex, n (%)* | | | | | | | | |
| - Male | 136,509 (54.1) | 157,174 (53.9) | 132,037 (54.2) | 160,302 (54.2) | 152,516 (54.0) | 106,894 (53.5) | 71,388 (53.2) | 80,443 (52.7) |
| *According to geographic regions, n (%)* | | | | | | | | |
| - Bangkok metropolitan area | 12,823 (5.1) | 12,673 (4.3) | 12,185 (5.0) | 13,745 (4.6) | 10,588 (3.8) | 7,428 (3.7) | 5,297 (4.0) | 6,145 (4.0) |
| - Central region | 51,253 (20.3) | 58,609 (20.1) | 47,692 (19.6) | 59,782 (20.2) | 55,684 (19.7) | 36,020 (18.0) | 23,107 (17.2) | 26,578 (17.4) |
| - Eastern region | 17,204 (6.8) | 18,498 (6.3) | 16,194 (6.7) | 20,151 (6.8) | 17,182 (6.1) | 11,811 (5.9) | 7,480 (5.6) | 8,883 (5.8) |
| - Northeastern region | 86,062 (34.1) | 105,889 (36.3) | 84,471 (34.7) | 107,701 (36.4) | 105,729 (37.4) | 80,873 (40.5) | 55,254 (41.2) | 59,305 (38.8) |
| - Northern region | 23,713 (9.4) | 26,227 (9.0) | 21,146 (8.7) | 25,473 (8.6) | 25,811 (9.1) | 17,920 (9.0) | 14,190 (10.6) | 15,769 (10.3) |
| - Western region | 13,706 (5.4) | 16,260 (5.6) | 12,703 (5.2) | 15,889 (5.4) | 14,625 (5.2) | 11,033 (5.5) | 7,305 (5.4) | 8,368 (5.5) |
| - Southern region | 47,592 (18.9) | 53,641 (18.4) | 49,072 (20.2) | 53,299 (18.0) | 52,779 (18.7) | 34,684 (17.4) | 21,587 (16.1) | 27,624 (18.1) |
| *According to hospital levels, n (%)* | | | | | | | | |
| - Primary hospital | 17,446 (6.9) | 21,565 (7.4) | 19,187 (7.9) | 23,242 (7.9) | 22,402 (7.9) | 16,304 (8.2) | 11,251 (8.4) | 13,058 (8.6) |
| - Secondary hospital | 171,127 (67.8) | 203,367 (69.7) | 164,355 (67.5) | 205,813 (69.5) | 199,119 (70.5) | 140,854 (70.5) | 91,820 (68.4) | 103,568 (67.8) |
| - Tertiary hospital | 56,142 (22.3) | 58,744 (20.1) | 52,783 (21.7) | 58,381 (19.7) | 54,480 (19.3) | 39,037 (19.5) | 29,127 (21.7) | 33,589 (22.0) |
| - Private hospital | 7,638 (3.0) | 8,121 (2.8) | 7,138 (2.9) | 8,604 (2.9) | 6,397 (2.3) | 3,574 (1.8) | 2,022 (1.5) | 2,457 (1.6) |

A00-A09, Intestinal infectious diseases; C15-C26, Malignant neoplasms of digestive organs; ICD-10, International Statistical Classification of Diseases and Related Health Problems, 10th Revision; K00-K14, Diseases of oral cavity, salivary glands and jaws; K20-K31, Diseases of esophagus, stomach, and duodenum; K35-K38, Diseases of appendix; K40-K46, Hernia; K50-K52, Noninfective enteritis and colitis; K55-K64, Other diseases of intestines; K65-K67, Diseases of peritoneum; K70-K77, Diseases of liver; K80-K87, Disorders of gallbladder, biliary tract and pancreas; K90-K93, Other diseases of the digestive system
