# Supplementary material for: Burdens and patterns of gastrointestinal diseases in Thai children: An analysis based on Thai National Health Coverage data
Source: Research Square preprint supplement (doi:10.21203/rs.3.rs-5958744/v1), 2025-02-06
Supplement: Supplementary file 2 [file a6886338e68e26d1dcdc1a42.docx]

# **Supplementary Table 1** Admission numbers and inpatient mortality rates of pediatric gastrointestinal diseases according to the diagnosis groups in the fiscal year 2022–2023

| **Primary diagnosis groups** | **Number of admissions** | | **Inpatient mortality number (n)** | **Inpatient mortality rate (per 1,000 admissions)** |
| --- | --- | --- | --- | --- |
| **n** | **%** |
| *A00-A09,* Intestinal infectious diseases | 124,037 | 63.4 | 30 | 0.2 |
| *C15-C26,* Malignant neoplasms of digestive organs | 287 | 0.2 | 5 | 17.4 |
| *K00-K14,* Diseases of the oral cavity, salivary glands, and jaws | 4,658 | 2.4 | 0 | 0 |
| *K20-K31,* Diseases of the esophagus, stomach, and duodenum | 25,171 | 12.9 | 3 | 0.1 |
| *K35-K38,* Diseases of appendix | 20,511 | 10.5 | 8 | 0.4 |
| *K40-K46,* Hernia | 1,912 | 1 | 0 | 0 |
| *K50-K52,* Noninfective enteritis and colitis | 1,728 | 0.9 | 0 | 0 |
| *K55-K64,* Other diseases of intestines | 5,104 | 2.6 | 9 | 1.8 |
| *K65-K67,* Diseases of peritoneum | 288 | 0.2 | 5 | 17.4 |
| *K70-K77,* Diseases of the liver | 529 | 0.3 | 8 | 15.1 |
| *K80-K87,* Disorders of the gallbladder, biliary tract, and pancreas | 1,009 | 0.5 | 4 | 4.0 |
| *K90-K93,* Other diseases of the digestive system | 1,458 | 0.7 | 3 | 2.1 |
| *R10-R19,* Symptoms and signs involving the digestive system and abdomen | 9,026 | 4.6 | 1 | 0.1 |
| *Total* | 195,718 | 100 | 76 | 0.4 |
